# Supplementary material for: Corticosteroids for treatment of sore throat: systematic review and meta-analysis of randomised trials
Source: PubMed Central journal article supplement — BMJ. 2017 Sep 20;358:j3887. doi: 10.1136/bmj.j3887 (PMC5605780; doi:10.1136/bmj.j3887), 2017-09-20
Supplement: sadb039974.ww2.pdf [file sadb039974.ww2.pdf]

**Appendix 2:** Summary of risk of bias assessments among the included RCTs. [posted as supplied by author]

|                    | Random sequence generation (selection bias) | Allocation concealment (selection bias) | Blinding of participants and personnel (performance bias) | Blinding of outcome assessment (detection bias) | Incomplete outcome data (attrition bias) | Selective reporting (reporting bias) |
|--------------------|---------------------------------------------|-----------------------------------------|-----------------------------------------------------------|-------------------------------------------------|------------------------------------------|--------------------------------------|
| Ahn, 2003          | +                                           | -                                       | -                                                         | -                                               | +                                        | +                                    |
| Bulloch, 2003      | +                                           | +                                       | +                                                         | +                                               | +                                        | +                                    |
| Hayward, 2017      | +                                           | +                                       | +                                                         | +                                               | +                                        | +                                    |
| Kinderman, 2005    | +                                           | +                                       | +                                                         | +                                               | +                                        | +                                    |
| Marvez-Valls, 1998 | +                                           | -                                       | +                                                         | +                                               | +                                        | +                                    |
| Niland, 2006       | +                                           | +                                       | +                                                         | +                                               | +                                        | +                                    |
| Olympia, 2005      | +                                           | +                                       | +                                                         | +                                               | -                                        | +                                    |
| O'Brien, 1994      | +                                           | +                                       | +                                                         | -                                               | +                                        | +                                    |
| Tasar, 2008        | +                                           | +                                       | +                                                         | +                                               | +                                        | +                                    |
| Wei, 2002          | +                                           | +                                       | +                                                         | +                                               | +                                        | +                                    |
