# Supplementary material for: Corticosteroids for treatment of sore throat: systematic review and meta-analysis of randomised trials
Source: PubMed Central journal article supplement — BMJ. 2017 Sep 20;358:j3887. doi: 10.1136/bmj.j3887 (PMC5605780; doi:10.1136/bmj.j3887), 2017-09-20
Supplement: sadb039974.ww3.pdf [file sadb039974.ww3.pdf]

**Appendix 3:** Supplementary tables and figure [posted as supplied by author]

**Table A** Results of the meta-analysis and subgroup analysis of RCTs assessing the effects of single-dose corticosteroids on complete resolution of pain at 24 and 48 hours, and relapse of the symptoms

| Outcome/subgroups                         |                   | No. of trials | RR         | 95% CI     |            | No. of participants |            | I <sup>2</sup> | P value for interaction |
|-------------------------------------------|-------------------|---------------|------------|------------|------------|---------------------|------------|----------------|-------------------------|
|                                           |                   |               |            | Lower      | Upper      | Intervention        | Control    |                |                         |
| Complete resolution of pain at 24 hours** | Adults            | 4             | 2.9        | 1.2        | 6.9        | 507                 | 453        | 75.2           | 0.261                   |
|                                           | Children          | 1             | 1.2        | 0.5        | 2.5        | 51                  | 38         | -              |                         |
|                                           | Intramuscular     | 2             | 4.6        | 1.6        | 13.0       | 96                  | 84         | 33.0           | 0.335                   |
|                                           | Oral              | 4             | 1.7        | 1.0        | 3.0        | 514                 | 473        | 54.1           |                         |
|                                           | Primary care      | 2             | 2.1        | 0.7        | 6.6        | 410                 | 369        | 79.6           | 0.815                   |
|                                           | ED                | 3             | 2.7        | 0.9        | 8.1        | 148                 | 122        | 71.2           |                         |
|                                           | <b>Total</b>      | <b>5</b>      | <b>2.2</b> | <b>1.2</b> | <b>4.3</b> | <b>558</b>          | <b>491</b> | <b>69.0</b>    | -                       |
| Complete resolution of pain at 48 hours** | Adults            | 3             | 1.5        | 1.2        | 1.9        | 513                 | 468        | 33.0           | 0.853                   |
|                                           | Children          | 1             | 1.4        | 0.95       | 1.99       | 48                  | 47         | -              |                         |
|                                           | Intramuscular     | 1             | 1.8        | 1.3        | 2.4        | 60                  | 64         | -              | 0.188                   |
|                                           | Oral              | 3             | 1.4        | 1.1        | 1.7        | 501                 | 451        | 0.0            |                         |
|                                           | Primary care      | 2             | 1.4        | 1.1        | 1.7        | 453                 | 404        | 0.0            | 0.405                   |
|                                           | ED                | 2             | 1.6        | 1.2        | 2.1        | 108                 | 111        | 13.9           |                         |
| <b>Total</b>                              | <b>4</b>          | <b>1.5</b>    | <b>1.3</b> | <b>1.8</b> | <b>561</b> | <b>515</b>          | <b>3.2</b> | -              |                         |
| Relapse of the symptoms                   | Adults            | 1             | 0.2        | 0.0        | 2.0        | 41                  | 44         | -              | ***                     |
|                                           | Children          | 2             | 0.5        | 0.2        | 1.7        | 199                 | 173        | 22.8           |                         |
|                                           | Low risk of bias  | 2             | 0.5        | 0.2        | 1.7        | 199                 | 173        | 22.8           | ***                     |
|                                           | High risk of bias | 1             | 0.2        | 0.0        | 4.0        | 60                  | 31         | -              |                         |
|                                           | <b>Total</b>      | <b>3</b>      | <b>0.5</b> | <b>0.2</b> | <b>1.7</b> | <b>199</b>          | <b>173</b> | <b>22.8</b>    | -                       |

ED: emergency department; RR: relative risk;

\*Culture-positive or positive test for group A beta-hemolytic streptococcus (GABHS) rapid test.

\*\* All RCTs for this outcome were at low risk of bias.

\*\*\* Due to small number of trials, we did not perform a statistical test of interaction between the two group.

**Table B** Results of the meta-analysis and subgroup analysis of RCTs assessing the effects of single-dose corticosteroids on mean time to onset of pain relief and to complete resolution of pain, and absolute pain reduction score (at 24 hours)

|                                          |                    | No. of trials | Mean difference | 95% CI       |             | No. of participants |            | I <sup>2</sup> | P value for interaction |
|------------------------------------------|--------------------|---------------|-----------------|--------------|-------------|---------------------|------------|----------------|-------------------------|
|                                          |                    |               |                 | Lower        | Upper       | Intervention        | Control    |                |                         |
| Mean time to onset of pain relief        | Adults             | 6             | -4.9            | -8.2         | -1.5        | 310                 | 288        | 81.0           | 0.986                   |
|                                          | Children           | 2             | -4.8            | -13.1        | 3.6         | 149                 | 160        | 83.2           |                         |
|                                          | Intramuscular      | 4             | -7.0            | -10.3        | -3.6        | 456                 | 448        | 73.0           | 0.090                   |
|                                          | Oral               | 5             | -3.0            | -6.1         | -0.1        | 459                 | 448        | 64.2           |                         |
|                                          | Primary care       | 1             | 0.5             | -4/1         | 5.1         | 129                 | 102        | -              | **                      |
|                                          | ED                 | 7             | -5.5            | -8.5         | -2.6        | 330                 | 346        | 77.0           |                         |
|                                          | Pathogen positive* | 4             | -5.6            | -8.0         | -3.2        | 122                 | 128        | 0.0            | 0.651                   |
|                                          | Pathogen negative  | 4             | -4.1            | -10.0        | 1.8         | 147                 | 105        | 66.6           |                         |
|                                          | Low risk of bias   | 4             | -4.8            | -7.8         | -1.9        | 459                 | 448        | 78.3           | 0.810                   |
|                                          | High risk of bias  | 4             | -5.1            | -8.1         | -2.1        | 165                 | 177        | 59.5           |                         |
|                                          | <b>Total</b>       | <b>8</b>      | <b>-4.8</b>     | <b>-7.8</b>  | <b>-1.9</b> | <b>459</b>          | <b>448</b> | <b>78.3</b>    | -                       |
| Mean time to complete resolution of pain | Adults             | 4             | -14.1           | -26.8        | -1.3        | 204                 | 207        | 84.4           | 0.613                   |
|                                          | Children           | 2             | -5.2            | -20.7        | 10.3        | 149                 | 160        | 72.1           |                         |
|                                          | Intramuscular      | 3             | -22.4           | -27.3        | -17.5       | 103                 | 113        | 0.0            | 0.001                   |
|                                          | Oral               | 3             | -1.5            | -12.6        | 9.5         | 250                 | 254        | 62.6           |                         |
|                                          | Primary care       | 1             | 5.8             | -6.5         | 18.1        | 101                 | 94         | -              | 0.281                   |
|                                          | ED                 | 5             | -14.5           | -24.6        | -4.5        | 252                 | 273        | 79.7           |                         |
|                                          | Pathogen positive* | 3             | -7.5            | -22.3        | 7.2         | 92                  | 112        | 59.7           | 0.886                   |
|                                          | Pathogen negative  | 3             | -9.6            | -34.1        | 14.8        | 96                  | 86         | 69.8           |                         |
|                                          | Low risk of bias   | 3             | -6.0            | -27.4        | 15.4        | 224                 | 228        | 93.3           | 0.302                   |
|                                          | High risk of bias  | 3             | -17.7           | -24.2        | -11.3       | 129                 | 139        | 0.0            |                         |
|                                          | <b>Total</b>       | <b>6</b>      | <b>-11.1</b>    | <b>-21.8</b> | <b>-0.4</b> | <b>353</b>          | <b>367</b> | <b>84.5</b>    | -                       |
| Absolute pain reduction (at 24 hours)    | Adults             | 6             | 1.5             | 0.9          | 2.2         | 477                 | 461        | 52.1           | 0.322                   |
|                                          | Children           | 2             | 0.8             | -0.5         | 2.1         | 149                 | 160        | 77.3           |                         |
|                                          | Intramuscular      | 3             | 1.5             | 0.8          | 2.2         | 624                 | 621        | 0.0            | 0.695                   |
|                                          | Oral               | 6             | 1.3             | 0.5          | 2.0         | 626                 | 621        | 74.3           |                         |
|                                          | Primary care       | 2             | 1.5             | -0.8         | 3.9         | 328                 | 316        | 88.5           | 0.781                   |
|                                          | ED                 | 6             | 1.2             | 0.6          | 1.8         | 298                 | 305        | 49.9           |                         |
|                                          | Pathogen positive* | 3             | 1.2             | -0.2         | 2.6         | 92                  | 112        | 75.9           | 0.926                   |
|                                          | Pathogen negative  | 3             | 1.3             | -1.3         | 3.9         | 96                  | 86         | 84.0           |                         |
|                                          | Low risk of bias   | 4             | 1.0             | -0.1         | 2.2         | 461                 | 444        | -              | 0.353                   |
|                                          | High risk of bias  | 4             | 1.6             | 1.1          | 2.2         | 165                 | 177        | 80.8           |                         |
|                                          | <b>Total</b>       | <b>8</b>      | <b>1.3</b>      | <b>0.7</b>   | <b>1.9</b>  | <b>626</b>          | <b>621</b> | <b>65.1</b>    | -                       |

ED: emergency department; RR: relative risk;

\*Culture-positive or positive test for group A beta-hemolytic streptococcus (GABHS) rapid test.

\*\* Due to small number of trials in one subgroup, we did not perform a statistical test of interaction between the two group.

**Table C** point estimates for outcomes across included articles to investigate selective outcome reporting

| study              | Pain at 24 hours | Pain at 48 hours | Time to onset of pain relief | Time to complete resolution of pain | Absolute Pain Reduction | Relapse of symptoms |
|--------------------|------------------|------------------|------------------------------|-------------------------------------|-------------------------|---------------------|
|                    | RR               | RR               | MD                           | MD                                  | MD                      | RR                  |
| O'Brien, 1994      | -                | -                | -6.1                         | -20.4                               | 1.3                     | -                   |
| Marvez-Valls, 1998 | -                | -                | -5.0                         | -13.8                               | 1.6                     | -                   |
| Wei, 2002          | 2.6              | -                | -4.7                         | -                                   | 1.0                     | -                   |
| Bulloch, 2003      | -                | -                | -0.5                         | 2.3                                 | 0.2                     | 1.0                 |
| Ahn, 2003          | -                | -                | -1.4                         | -                                   | 1.9                     | -                   |
| Kinderman, 2005    | 4.1              | 1.7              | -                            | -                                   | 2.7                     | 0.2                 |
| Olympia, 2005      | -                | -                | -9.0                         | -13.5                               | 1.5                     | 0.2                 |
| Niland, 2006       | 1.2              | 1.4              | -                            | -                                   | -                       | -                   |
| Tasar, 2008        | 8.8              | 1.8              | -11.8                        | -24.8                               | -                       | -                   |
| Hayward, 2017      | 1.3              | 1.3              | 0.5                          | 5.8                                 | 0.3                     | -                   |

RR: relative risk; MD: mean difference

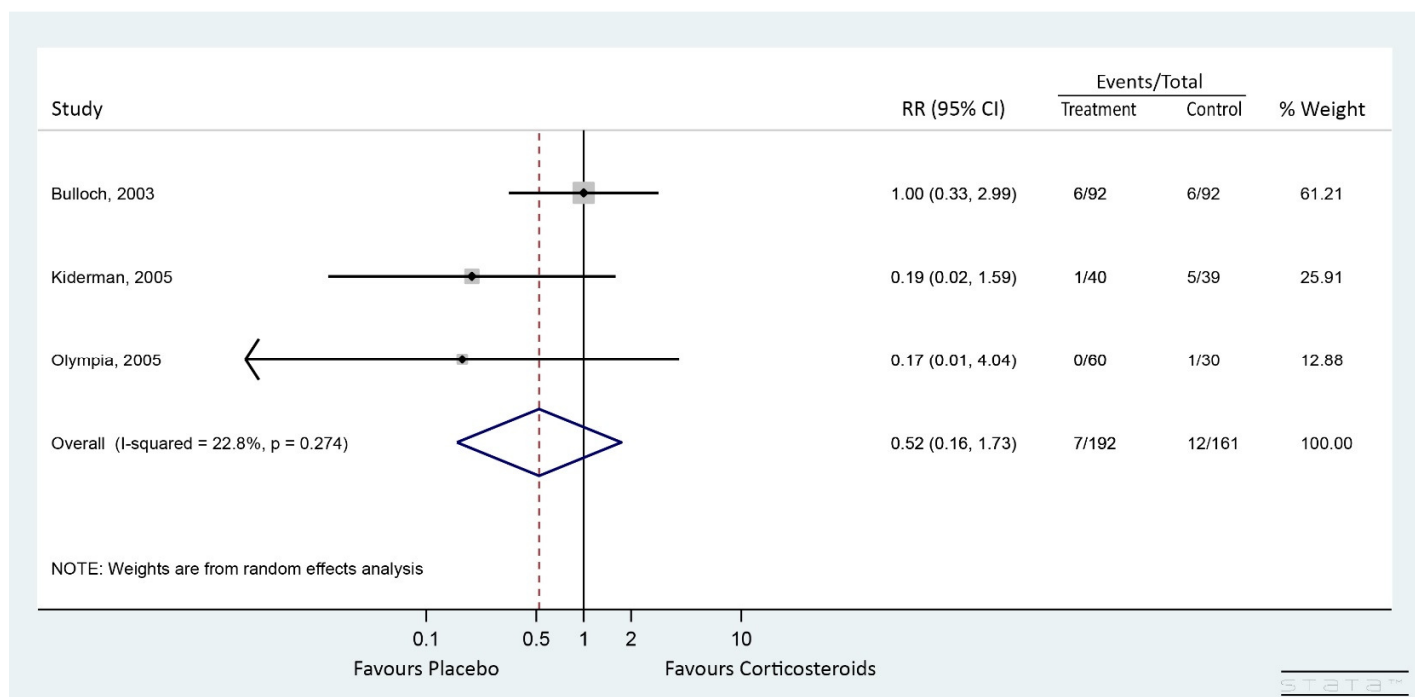

**Fig A** Forest plot showing relative risk (RR) for relapse/recurrence of symptoms for corticosteroid vs. placebo groups. Horizontal bars denote 95% CIs. Studies are represented as squares centred on the point estimate of the result of each study. The area of the square represents the weight given to the study in the meta-analysis. The pooled RR was calculated by DerSimonian–Laird random-effects model. The diamond represents the overall estimated effect and its 95% CI in total (centre line of diamond, dashed line). The solid vertical line is the line of no effect.
